# Supplementary material for: Decarbonisation of calcium carbonate at atmospheric temperatures and pressures, with simultaneous CO2 capture, through production of sodium carbonate
Source: Royal Society of Chemistry journal article supplement (doi:10.1039/d1ee02637b), 2021-01-01
Supplement: d1ee02637b1.xlsx [file d1ee02637b1.xlsx]

## Sheet: Sheet1
ID	H2O (g)	NaOH (g)	CaCO3 (g)	H2O (wt.%)	NaOH (wt.%)	CaCO3 (wt.%)	Conversion (%)	NaOH used (%)	Process A (kJ/kg)	Process B (kJ/kg)
1	67.53	46.05	10.03	54.6	37.3	8.1	96	16.7	51820	42201
2	63.02	56.04	10.02	48.8	43.4	7.8	95.6	13.7	55559	50595
3	223.32	100.02	10	67	30	3	93	7.4	132745	129418
4	135.03	92.17	10	56.9	38.9	4.2	90.6	7.9	101810	95001
5	15.04	12.01	9.98	40.6	32.4	27	86	57.1	19400	15771
6	10.03	10.03	10.06	33.3	33.3	33.4	83.7	67.1	16677	14161
7	45.04	36.08	10.06	49.4	39.6	11	81.1	18.1	45470	39353
8	20.06	12.06	10	47.6	28.6	23.7	78.7	52.2	22495	16803
9	20.08	19.98	9.89	40.2	40	19.8	78.5	31.1	27592	24906
10	30.04	24.03	9.97	46.9	37.5	15.6	78.1	25.9	33963	28900
11	60.03	30.07	10.08	59.9	30	10.1	78.1	20.9	49096	38941
12	12.07	12.07	10	35.4	35.4	29.3	77.7	51.4	19533	16976
13	15.04	10.05	9.98	42.9	28.7	28.5	73.8	58.6	20131	15503
14	30.01	20.04	10	50	33.4	16.7	70.6	28.2	33998	26972
15	40.04	25.04	10.06	53.3	33.3	13.4	70	22.5	41864	32582
16	87.53	27.51	10.02	70	22	8	69.3	20.2	65149	55759
17	25	15.06	10.03	49.9	30.1	20	69.2	36.9	28787	21752
18	20.06	14.98	10.08	44.5	33.2	22.3	69.1	37.2	26479	21613
19	8.02	8.06	10.02	30.7	30.9	38.4	69	68.6	16457	13961
20	15.05	15.01	9.99	37.6	37.5	24.9	67.8	36.1	24757	22120
21	40	20.01	9.97	57.2	28.6	14.2	67.4	26.9	39894	29372
22	13.5	11.99	10.03	38	33.8	28.2	66.3	44.4	22182	18900
23	12.09	9.99	9.97	37.7	31.2	31.1	62.8	50.1	20885	17289
24	7.03	8.03	10.02	28	32	40	61.4	61.2	17080	15053
25	14.06	12.98	9.99	38	35.1	27	59.6	36.6	25027	21851
26	10.02	8.05	10.03	35.7	28.6	35.7	58.5	58.2	19144	15569
27	10.05	12	10.02	31.3	37.4	31.2	57.6	38.4	22624	21061
28	30.02	15.04	10.01	54.5	27.3	18.2	55.2	29.4	37066	26446
29	8.06	10.07	10.07	28.6	35.7	35.7	53.3	42.6	20919	19488
30	15.03	8.01	9.98	45.5	24.3	30.2	52.5	52.3	23467	16777
31	20.02	13.02	10.04	46.5	30.2	23.3	52.2	32.2	30963	24201
32	15.09	11.06	10.04	41.7	30.6	27.7	51.9	37.7	26387	21389
33	12.02	8.08	10.03	39.9	26.8	33.3	51.9	51.5	21854	16961
34	9.98	11.44	10	31.8	36.4	31.8	51.1	35.7	24044	22307
35	15.02	20.06	10.01	33.3	44.5	22.2	48.5	19.3	36627	37114
36	25.01	13	10.05	52	27	20.9	47.4	29.3	36544	26106
37	25.01	11.99	12.03	51	24.5	24.5	46.1	36.9	31584	21714
38	15.04	13.09	10.02	39.4	34.3	26.3	45.9	28.1	31023	27048
39	50.03	64.99	10	40	52	8	45.4	5.6	109573	118442
40	30.06	11.99	10	57.8	23	19.2	41.7	27.8	43328	32892
41	20	11.04	10.05	48.7	26.9	24.5	40.8	29.7	35204	25809
42	40.16	15.05	10.04	61.5	23.1	15.4	39.4	21	56788	46950
43	26.05	13.02	10.02	53.1	26.5	20.4	38.2	23.5	44541	34196
44	7.02	10.07	10.02	25.9	37.1	37	31.9	25.4	29112	29372
45	20.01	8.05	10.02	52.5	21.1	26.3	31.9	31.8	38661	28054
46	5.02	12.06	10.02	18.5	44.5	37	31.8	21.1	30282	34400
47	12.05	15.05	10.09	32.4	40.5	27.1	30.1	16.1	43237	43557
48	40.05	12.08	10.07	64.4	19.4	16.2	29.4	19.6	68479	59295
49	50.02	15.03	10.07	66.6	20	13.4	28.7	15.4	85652	77733
50	10.03	15	10.01	28.6	42.8	28.6	28.5	15.2	43223	45866
51	21.35	35.33	10.03	32	53	15	27.7	6.3	91714	105497
52	10.04	15	12.09	27	40.4	32.6	26.7	17.2	39082	41092
53	6.06	14.98	10	19.5	48.3	32.2	26.3	14	41689	49459
54	25.05	8.04	10.14	57.9	18.6	23.5	21.1	21.3	61457	51852
55	13.51	15.98	9.98	34.2	40.5	25.3	20.7	10.4	64340	65424
56	50	12.03	9.99	69.4	16.7	13.9	19.8	13.1	114640	109717
57	30.02	10.03	10.04	59.9	20	20	19.7	15.8	78272	69767
58	5.02	10.05	10.01	20	40.1	39.9	16.5	13.1	45749	52442
59	30.01	8.04	9.99	62.5	16.7	20.8	16.1	16	88728	81088
60	10.06	16.95	10.03	27.2	45.8	27.1	15.4	7.3	79913	91569
61	8.04	15.04	9.99	24.3	45.5	30.2	13.5	7.2	79079	93031
62	4.03	12.06	10.02	15.4	46.2	38.4	12.3	8.2	64061	81798
63	40.04	10.06	10.03	66.6	16.7	16.7	12.1	9.6	148911	148717
64	5.06	8.03	10.04	21.9	34.7	43.4	12	12	52248	57204
65	7.07	11.99	9.98	24.3	41.3	34.4	11.1	7.4	78397	89878
66	4.1	15.02	10.01	14.1	51.6	34.4	11.1	5.9	83320	112158
67	4.03	9.96	10.05	16.8	41.4	41.8	10	8.1	67046	82944
68	40	8	9.99	69	13.8	17.2	7.5	7.5	224088	240740
69	50.03	10.03	10.05	71.4	14.3	14.3	7.3	5.8	283156	318669
70	10.12	19	10.03	25.8	48.5	25.6	7.2	3.1	174822	217207
71	50	7.99	10	73.5	11.8	14.7	3.5	3.5	549782	767729
